# Supplementary material for: Ex vivo propagation in a novel 3D high-throughput co-culture system for multiple myeloma
Source: PubMed Central journal article supplement (PMC9016043; doi:10.1007/s00432-021-03854-6), 2022-01-24
Supplement: 432_2021_3854_MOESM1_ESM.pdf [file 432_2021_3854_MOESM1_ESM.pdf]

**A** PI staining (U266, n=5)  
3 $\mu$ M AUR (48h)

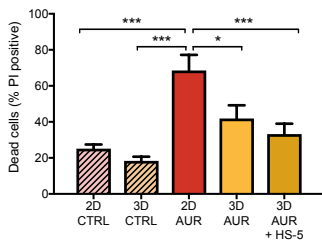

**B** CD138 positivity (U266, n=5)  
3 $\mu$ M AUR (48h)

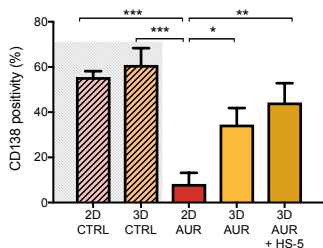

Figure S1
